# Supplementary material
Source: HighWire-hosted journal article supplement (https://bmjopen.bmj.com/content/14/9/e091005)
Supplement: inline-supplementary-material-1 [file inline-supplementary-material-1.pdf]

## **Supplementary materials - Informal carer involvement in the transition of medicines-related care for patients moving from hospital to home: a realist review protocol**

### **Draft search strategy**

#### Transition:

- transition points
- transition of care
- transition\*
- transfer
- discharge\*
- admission\*

#### Medication:

- medication management
- medicines management
- medicines\*
- medication\*

#### Caregiver:

- caregivers
- carers
- relatives
- family
